# Supplementary material for: Comparison of the Autism Diagnostic Observation Schedule and Childhood Autism Rating Scale in the Diagnosis of Autism Spectrum Disorder: A Preliminary Study
Source: PubMed Central journal article supplement — Soa Chongsonyon Chongsin Uihak. 2018 Oct 1;29(4):172–7. doi: 10.5765/jkacap.180015 (PMC7289466; doi:10.5765/jkacap.180015), 2018-10-01
Supplement: JKACAP-29-172_suppl.pdf [file JKACAP-29-172_suppl.pdf]

**Supplementary Table 1.** Age-distribution of the subjects

| Distribution of age (month) | N  |
|-----------------------------|----|
| 24 < age ≤ 36               | 20 |
| 36 < age ≤ 48               | 25 |
| 48 < age ≤ 60               | 16 |
| 60 < age ≤ 72               | 10 |
| 72 < age ≤ 84               | 3  |
| 84 < age ≤ 96               | 3  |
| 94 < age ≤ 108              | 1  |
| 108 < age ≤ 120             | 0  |
